# Supplementary material
Source: PubMed Central journal article supplement (PMC3203699)
Supplement: cr20112x1.pdf [file cr20112x1.pdf]

## Supplementary information, Figure S1

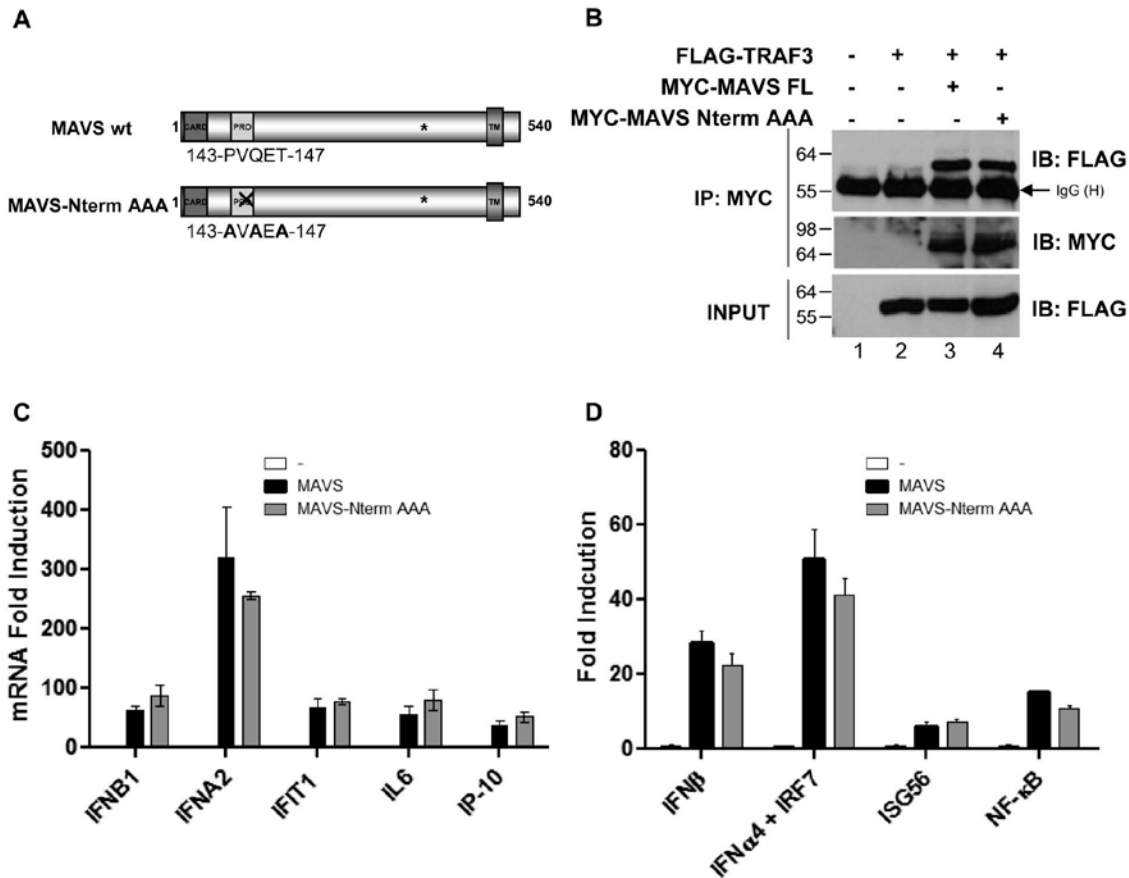

**Figure S1** N-terminal binding of TRAF3 to MAVS is not required for IFN activation. **(A)** Schematic representation of the MAVS wt and MAVS-Nterm AAA. The highly conserved sequence in region 143-PVQET-147 of MAVS, as well as the mutations sites of MAVS-Nterm AAA is shown. The CARD, PRO and TM domains are also shown. **(B)** HEK293 cells were transfected with either: empty vector, FLAG-TRAF3, MYC-MAVS wt or MYC-MAVS-Nterm AAA alone or in co-transfection with FLAG-TRAF3. Co-immunoprecipitation was performed using an anti-MYC antibody followed by immunoblot with an anti-FLAG to reveal interaction with FLAG-TRAF3 (top panel). Immunoprecipitated MAVS was revealed by immunoblot with anti-MYC antibody (second panel). Input for TRAF3 is shown (bottom panel). **(C)** qPCR analysis of total RNA isolated from HeLa cells transfected either with empty vector, MAVS wt or MAVS-Nterm AAA. Relative fold expression levels of *IFNB1*, *IFNA2*, *IFIT1* (ISG56), *IL6* and *IP-10* versus *ACTIN* mRNA are shown. Data is representative of at least two experiments run in duplicate. **(D)** HeLa cells were transfected with IFN $\alpha$ 4-Luc (IRF7), IFN $\beta$ -Luc, ISG56-Luc, or NF- $\kappa$ B reporter plasmid, and expression plasmids encoding either: empty, MAVS wt or MAVS-Nterm AAA as indicated. Luciferase activity was analyzed at 24 hours post-transfection and fold activation was determined compared to empty vector; values represent the average  $\pm$  S.D. Results are representative of at least three experiments run in triplicate.
